# Supplementary material for: Pathway-Based Analysis of Genome-Wide Association Data Identified SNPs in HMMR as Biomarker for Chemotherapy- Induced Neutropenia in Breast Cancer Patients
Source: Front Pharmacol. 2018 Mar 13;9:158. doi: 10.3389/fphar.2018.00158 (PMC5859084; doi:10.3389/fphar.2018.00158)
Supplement: Supplementary file 3 [file Data_Sheet_2.XLSX]

## Sheet: Table_S1
Supplementary Table S2: Genes involved into the PK/PD pathways of chemotherapy drugs as shown in the PharmGKB database.
Gene	Entrez Gene ID	Drugs*
ABCC3	8714	5-fluorouracil
ABCC4	10257	5-fluorouracil
ABCC5	10057	5-fluorouracil
DHFR	1719	5-Fluorouracil
DPYD	1806	5-fluorouracil
DPYS	1807	5-fluorouracil
FPGS	2356	5-fluorouracil
GGH	8836	5-fluorouracil
MTHFR	4524	5-fluorouracil
PPAT	5471	5-fluorouracil
SLC22A7	10864	5-fluorouracil
TDG	6996	5-fluorouracil
TYMP	1890	5-fluorouracil
TK1	7083	5-fluorouracil
TYMS	7298	5-fluorouracil
UPP1	7378	5-fluorouracil
UPP2	151531	5-fluorouracil
UCK1	83549	5-fluorouracil
UCK2	7371	5-fluorouracil
UMPS	7372	5-fluorouracil
XRCC3	7517	5-fluorouracil
SMUG1	23583	5-fluorouracil
RRM1	6240	5-fluorouracil
RRM2	6241	5-fluorouracil
SLC29A1	2030	5-fluorouracil
ERCC1	2067	5-fluorouracil, cyclophsphamide
ABCG2	9429	5-fluorouracil, doxorubicin
TP53	7157	5-fluorouracil, doxorubicin
ADH1A	124	cyclophosphamide
ADH1B	125	cyclophosphamide
ADH1C	126	cyclophosphamide
ADH4	127	cyclophosphamide
ADH5	128	cyclophosphamide
ADH6	130	cyclophosphamide
ADH7	131	cyclophosphamide
ALDH1A1	24188	cyclophosphamide
ALDH2	217	cyclophosphamide
ALDH3A1	218	cyclophosphamide
ALDH5A1	7915	cyclophosphamide
AKR1B1	231	cyclophosphamide
AKR1B10	57016	cyclophosphamide
CYP2C9	1559	cyclophosphamide
CYP2B6	1555	cyclophosphamide
CYP2A6	1548	cyclophosphamide
CYP2C8	1558	cyclophosphamide
CYP2C19	1557	cyclophosphamide
ERCC4	2072	cyclophosphamide
GSTA1	2938	cyclophosphamide
GSTA2	2939	cyclophosphamide
GSTA3	2940	cyclophosphamide
GSTA4	2941	cyclophosphamide
GSTA5	221357	cyclophosphamide
GSTM1	2944	cyclophosphamide
GSTM2	2946	cyclophosphamide
GSTM3	2947	cyclophosphamide
GSTM4	2948	cyclophosphamide
GSTM5	2949	cyclophosphamide
GSTO1	9446	cyclophosphamide
GSTO2	119391	cyclophosphamide
GSTP1	2950	cyclophosphamide
GSTZ1	2954	cyclophosphamide
GSTT1	2952	cyclophosphamide
GSTT2	2953	cyclophosphamide
MGMT	4255	cyclophosphamide
CYP3A5	1577	cyclophosphamide
CYP3A4	1576	cyclophosphamide
CYP3A5	1577	cyclophosphamide
AKR1A1	10327	cyclophosphamide, doxorubicin
ABCB1	5243	doxorubicin
ABCC1	4363	doxorubicin
ABCC2	1244	doxorubicin
AKR1C3	8644	doxorubicin
CBR1	873	doxorubicin
CBR3	874	doxorubicin
CAT	847	doxorubicin
ERCC2	2068	doxorubicin
GPX1	2876	doxorubicin
MLH1	4292	doxorubicin
MSH2	4436	doxorubicin
NDUFS2	4720	doxorubicin
NDUFS3	4722	doxorubicin
NDUFS7	374291	doxorubicin
NQO1	1728	doxorubicin
NOS1	4842	doxorubicin
NOS2	4843	doxorubicin
NOS3	4846	doxorubicin
NFKB1	4790	doxorubicin
POR	5447	doxorubicin
RALBP1	10928	doxorubicin
SLC22A16	85413	doxorubicin
SOD1	6647	doxorubicin
TOP2A	7153	doxorubicin
UGT2B7	7364	doxorubicin
UPB1	51733	doxorubicin
XDH	7498	doxorubicin
* Chemotherapy drugs used in the SUCCESS-A trail were 5-fluorouracil, cyclophosphamide and epirubicin. Genes involved in the PK/PD pathways of doxorubicin in the PharmGKB were used because epirubicin was not included in the PharmGKB.
